# Supplementary material for: Interconnected core–shell carbon nanotube–graphene nanoribbon scaffolds for anchoring cobalt oxides as bifunctional electrocatalysts for oxygen evolution and reduction
Source: Royal Society of Chemistry journal article supplement (doi:10.1039/c5ta02967h), 2015-01-01
Supplement: c5ta02967h1.pdf [file c5ta02967h1.pdf]

*Supporting Information*

**Interconnected Core-Shell Carbon Nanotube/Graphene Nanoribbon  
Scaffolds for Anchoring Cobalt Oxides as Bifunctional Electrocatalysts for  
Oxygen Evolution and Reduction**

*Xunyu Lu, Hubert M. Chan, Chia-Liang Sun, Chuan-Ming Tseng, and Chuan Zhao\**

**Table S1.** Oxygen electrode activities

| <b>Catalyst</b>                                         | <b>OER: <math>E(V)</math> at</b>              | <b>ORR: <math>E(V)</math> at</b>              | <b>Oxygen electrode</b>                                          |
|---------------------------------------------------------|-----------------------------------------------|-----------------------------------------------|------------------------------------------------------------------|
| <b>Material</b>                                         | <b><math>j = 10 \text{ mA cm}^{-2}</math></b> | <b><math>j = -3 \text{ mA cm}^{-2}</math></b> | <b><math>\Delta (E_{\text{OER}} - E_{\text{ORR}}) (V)</math></b> |
| <b>Co<sub>3</sub>O<sub>4</sub>/N-csCNT-</b>             | 1.59                                          | 0.79                                          | 0.80                                                             |
| <b>GNR</b>                                              |                                               |                                               |                                                                  |
| <b>Co<sub>3</sub>O<sub>4</sub>/graphene<sup>a</sup></b> | 1.61                                          | 0.82                                          | 0.79                                                             |
| <b>Co<sub>3</sub>O<sub>4</sub>/MWCNT<sup>b</sup></b>    | 1.62                                          | 0.58                                          | 1.04                                                             |
| <b>20 wt % Ir/C<sup>c</sup></b>                         | 1.61                                          | 0.69                                          | 0.92                                                             |
| <b>20 wt % Ru/C<sup>c</sup></b>                         | 1.62                                          | 0.61                                          | 1.01                                                             |
| <b>20 wt % Pt/C<sup>c</sup></b>                         | 2.02                                          | 0.86                                          | 1.16                                                             |
| <b>Mn oxide<sup>c</sup></b>                             | 1.77                                          | 0.73                                          | 1.04                                                             |

<sup>a</sup>Data from reference [S1]. <sup>b</sup>Data from reference [S2]. <sup>c</sup>Data from reference [S3].

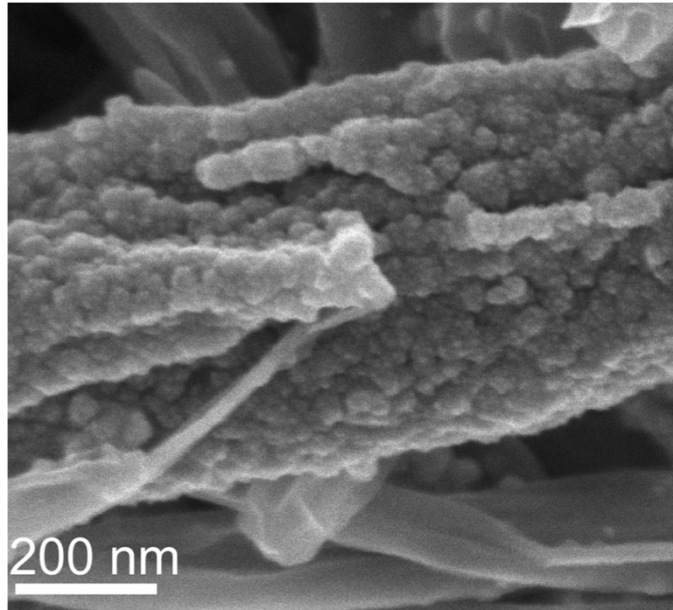

**Fig. S1** SEM image of the Co<sub>3</sub>O<sub>4</sub>/N-csCNT-GNR composite.

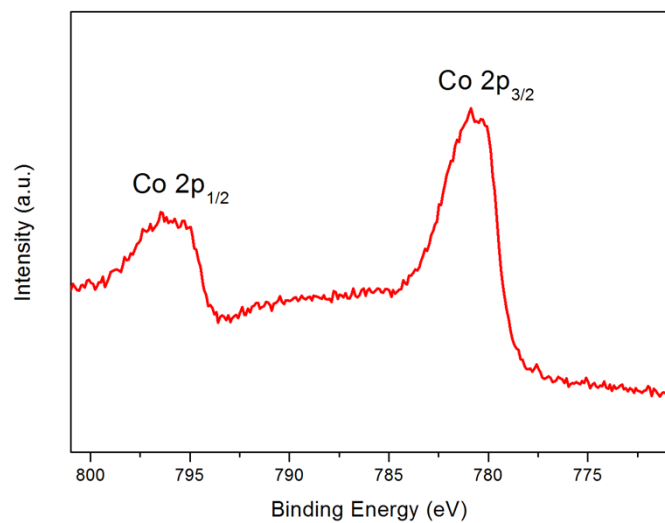

**Fig. S2** Co 2p XPS survey spectrum of the Co<sub>3</sub>O<sub>4</sub>/N-csCNT-GNR composite.

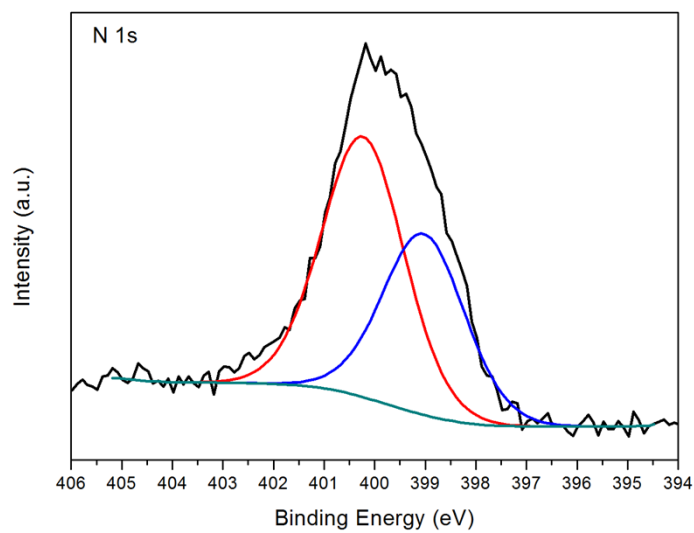

**Fig. S3** N 1s XPS survey spectrum of the Co<sub>3</sub>O<sub>4</sub>/N-csCNT-GNR composite.

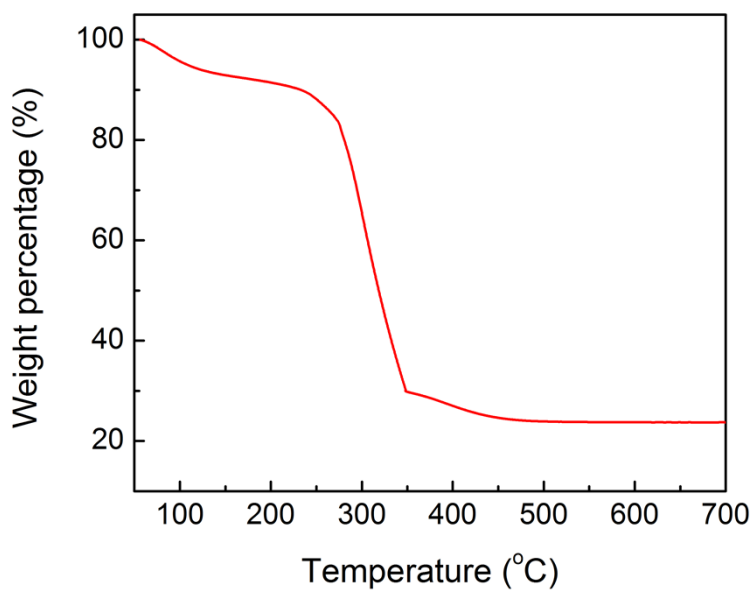

**Fig. S4** TGA curve of the  $\text{Co}_3\text{O}_4/\text{N-csCNT-GNR}$  composite obtained in air ramped from room temperature to 700 °C.

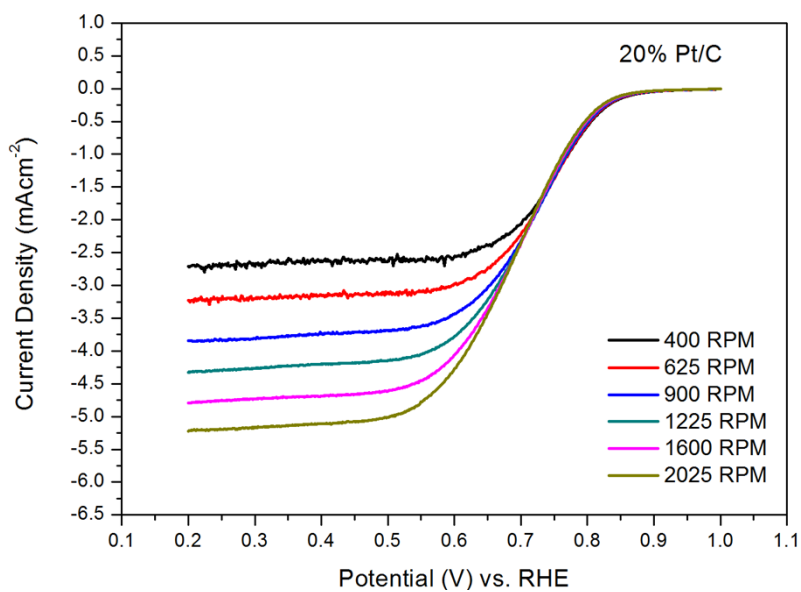

**Fig. S5** Rotating disk voltammograms of 20% Pt/C at various rotational speeds in  $\text{O}_2$  saturated 0.1 M KOH at a scan rate of  $5 \text{ mV s}^{-1}$ .

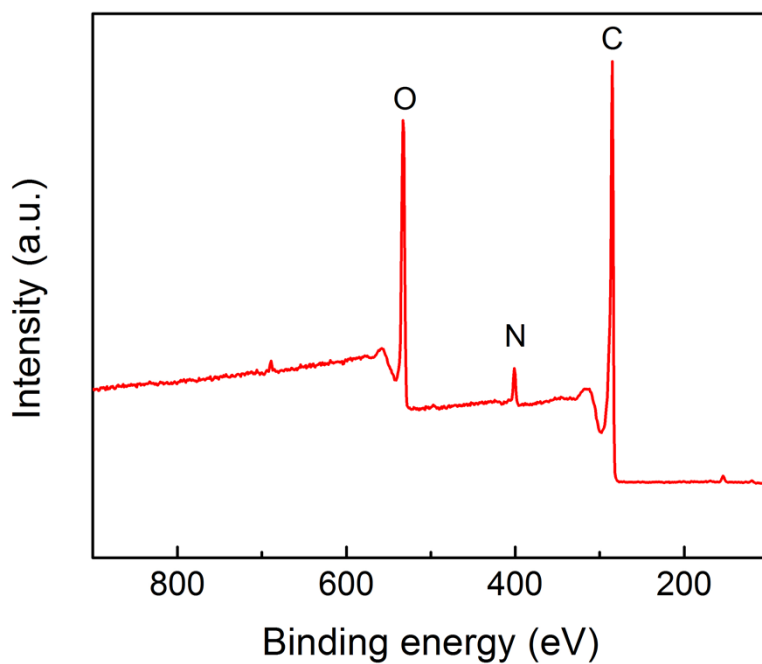

**Fig. S6** XPS survey spectra of N-csCNT-GNR.

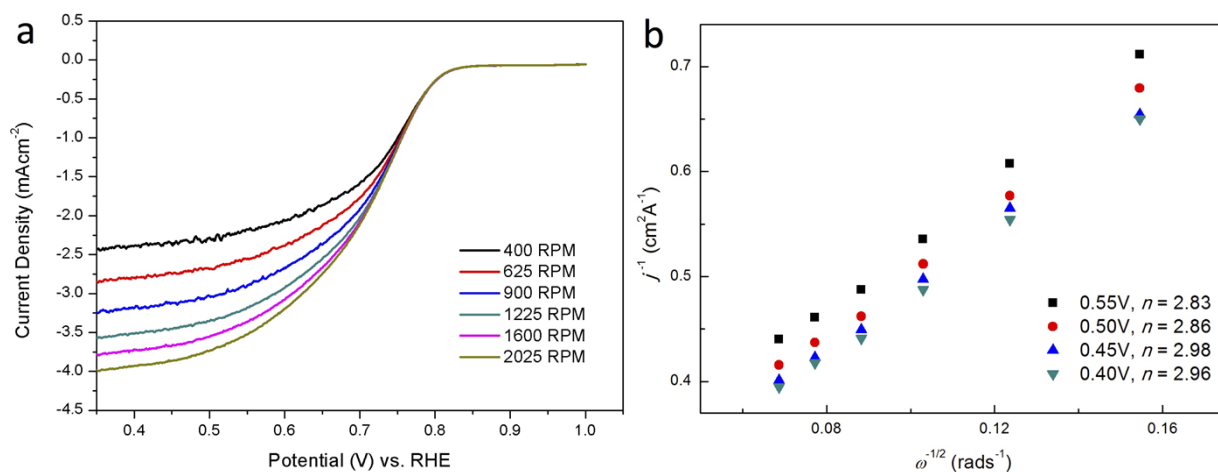

**Fig. S7 (a)** Rotating disk voltammograms of N-csCNT-GNR at various rotational speeds in  $O_2$  saturated 0.1 M KOH. **(b)** The linear relationship in the Koutecky-Levich plot ( $J^{-1}$  vs.  $\omega^{-1/2}$ ).

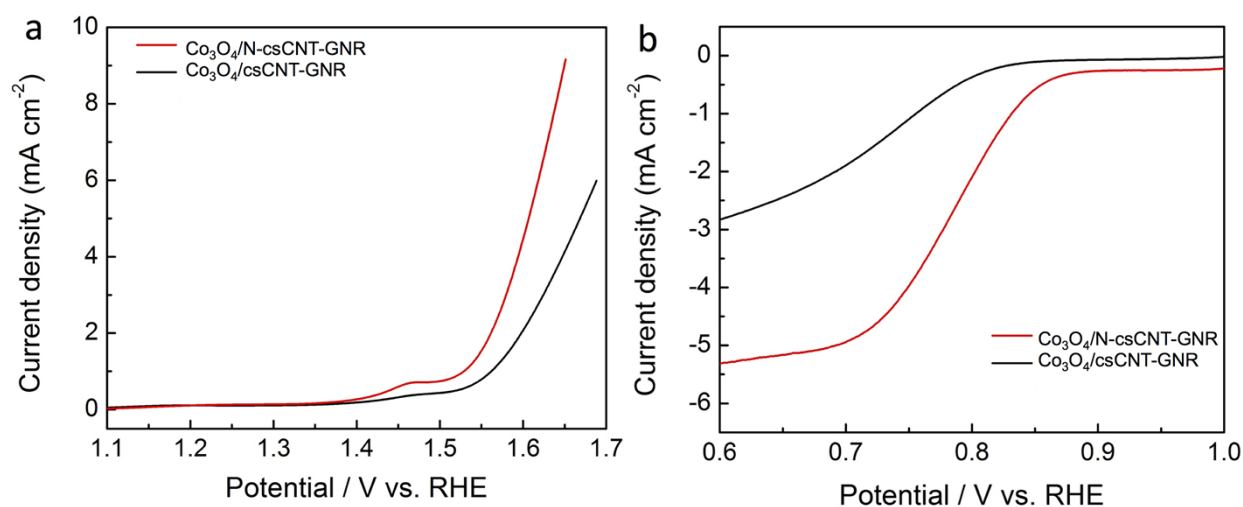

**Fig. S8** RDE voltammograms obtained with  $\text{Co}_3\text{O}_4/\text{N-csCNT-GNR}$  and  $\text{Co}_3\text{O}_4/\text{csCNT-GNR}$  composites loaded GC electrodes at 1600 rpm in 0.1 M KOH with a scan rate of  $5\text{mV s}^{-1}$  in the potential range of **(a)** OER and **(b)** ORR, respectively.

## References

- (S1) Liang, Y. Y.; Li, Y. G.; Wang, H. L.; Zhou, J. G.; Wang, J.; Regier, T.; Dai, H. J. *Nat. Mater.* **2011**, *10*, 780.
- (S2) Lu, X. Y.; Zhao, C. *J. Mater. Chem. A* **2013**, *1*, 12053.
- (S3) Gorlin, Y.; Jaramillo, T. F. *J. Am. Chem. Soc.* **2010**, *132*, 13612.
